# Supplementary material for: Risk of Cerebrovascular Events in Intracerebral Hemorrhage Survivors With Atrial Fibrillation: A Nationwide Cohort Study
Source: PubMed Central journal article supplement — Stroke. 2022 Apr 12;53(8):2559–68. doi: 10.1161/STROKEAHA.121.038331 (PMC9311292; doi:10.1161/strokeaha.121.038331), 2022-04-12
Supplement: str-53-2559-s001.pdf [file str-53-2559-s001.pdf]

## **SUPPLEMENTARY MATERIAL**

### **Risk of cerebrovascular events in intracerebral hemorrhage survivors with atrial fibrillation: an analysis of the Danish Stroke Registry**

**Table S1.** List of ICD-10, procedure, and ATC codes used to define the in- and exclusion criteria, comorbidities, medical therapies, and outcomes.

**Table S2.** Baseline patient characteristics of the subpopulation initiating/resuming oral anticoagulant therapy during follow-up.

**Table S3.** Absolute risk of cerebrovascular events and all-cause death 1 year after initiation/resumption of oral anticoagulant therapy in patients with intracerebral hemorrhage and atrial fibrillation.

**PRESTIGE-AF Consortium Author List**

**STROBE Statement**

**Table S1.** List of ICD-10, procedure, and ATC codes used to define the in- and exclusion criteria, comorbidities, medical therapies, and outcomes.

|                                    |                            | <b>Data source</b>                                                          |                       |                                  |
|------------------------------------|----------------------------|-----------------------------------------------------------------------------|-----------------------|----------------------------------|
|                                    | <b>Variable definition</b> | <b>ICD-10 code/<br/>Procedure code</b>                                      | <b>ATC drug code*</b> | <b>Registry sources</b>          |
| <b>In- and exclusion criteria</b>  |                            |                                                                             |                       |                                  |
| Atrial fibrillation                | Yes/no                     | I48                                                                         |                       | Danish National Patient Registry |
| Thrombolysis                       | Yes/no                     |                                                                             |                       | Danish Stroke Registry           |
| Intracerebral hemorrhage           | Yes/no                     | I61                                                                         |                       | Danish Stroke Registry           |
| Previous intracerebral hemorrhage  | Yes/no                     | I61; ICD-8:431                                                              |                       | Danish National Patient Registry |
| Traumatic intracerebral hemorrhage | Yes/no                     | S063C; S064; S065; S066                                                     |                       | Danish National Patient Registry |
| Brain imaging                      | Yes/no                     |                                                                             |                       | Danish Stroke Registry           |
| Previous venous thromboembolism    | Yes/no                     | I801; I802; I803; I808; I809; I819; I636; I676; I822; I823; I828; I829; I26 |                       | Danish National Patient Registry |
| Recent acute myocardial            | Yes/no                     | I21; I23; KFNG                                                              |                       | Danish National Patient Registry |

|                                                   |                                                                          |         |  |                                                                    |
|---------------------------------------------------|--------------------------------------------------------------------------|---------|--|--------------------------------------------------------------------|
| infarction or percutaneous coronary intervention  |                                                                          |         |  |                                                                    |
| Left atrial appendage occlusion device            | Yes/no                                                                   | KFFW98A |  | Danish National Patient Registry                                   |
| Severe renal dysfunction requiring dialysis       | Yes/no                                                                   | BJFD    |  | Danish National Patient Registry                                   |
| <b>Clinical characteristics and comorbidities</b> |                                                                          |         |  |                                                                    |
| Age                                               | Number                                                                   |         |  | Danish Civil Registration System                                   |
| Sex                                               | Female/male                                                              |         |  | Danish Civil Registration System                                   |
| CHA <sub>2</sub> DS <sub>2</sub> -VASc score      | Score 2-3,<br>Score 4-6,<br>Score >6                                     |         |  | Danish National Patient Registry<br>National Prescription Registry |
| Scandinavian Stroke Scale                         | Mild (>43),<br>Moderate (26-43), Severe (<26) and as continuous variable |         |  | Danish Stroke Registry                                             |

|                                                 |                                 |                                                       |  |                                  |
|-------------------------------------------------|---------------------------------|-------------------------------------------------------|--|----------------------------------|
| Surgical evacuation of intracerebral hemorrhage | Yes/no                          |                                                       |  | Danish Stroke Registry           |
| Diabetes mellitus                               | Yes/no                          | Patient chart                                         |  | Danish Stroke Registry           |
| Hypertension                                    | Yes/no                          | Patient chart                                         |  | Danish Stroke Registry           |
| Heart failure                                   | Yes/no                          | Patient chart                                         |  | Danish Stroke Registry           |
| Chronic kidney disease                          | Yes/no                          | Patient chart                                         |  | Danish Stroke Registry           |
| Peripheral artery disease                       | Yes/no                          | Patient chart                                         |  | Danish Stroke Registry           |
| Previous myocardial infarction                  | Yes/no                          | Patient chart                                         |  | Danish Stroke Registry           |
| Chronic obstructive pulmonary disorder          | Yes/no                          | Patient chart                                         |  | Danish Stroke Registry           |
| Previous ischemic stroke                        | Yes/no                          | I63; I64;                                             |  | Danish National Patient Registry |
| Previous major extracranial bleeding            | Yes/no                          | D62; J942; H113;<br>H356; H431; N02; R04;<br>R31; R58 |  | Danish National Patient Registry |
| Smoking                                         | Current, former, never, missing |                                                       |  | Danish Stroke Registry           |

|                                           |                                                  |  |                                                         |                                   |
|-------------------------------------------|--------------------------------------------------|--|---------------------------------------------------------|-----------------------------------|
| Alcohol                                   | Recommended,<br>above<br>recommended,<br>missing |  |                                                         | Danish Stroke<br>Registry         |
| Civil status                              | Cohabitant,<br>alone, other,<br>missing          |  |                                                         | Danish Stroke<br>Registry         |
| <b>Medications</b>                        |                                                  |  |                                                         |                                   |
| Statins                                   | Yes/no                                           |  |                                                         | Danish Stroke<br>Registry         |
| Selective Serotonin<br>Reuptake Inhibitor | Yes/no                                           |  |                                                         | Danish Stroke<br>Registry         |
| Antiplatelet therapy                      | Yes/no                                           |  | B01AC06;<br>B01AC04                                     | National Prescription<br>Registry |
| Oral anticoagulation<br>therapy           | Yes/no                                           |  | B01AA03;<br>B01AE07;<br>B01AF01;<br>B01AF02;<br>B01AA04 | National Prescription<br>Registry |
| <b>Outcomes</b>                           |                                                  |  |                                                         |                                   |
| Recurrent<br>intracerebral<br>hemorrhage  | Yes/no                                           |  |                                                         | Danish Stroke<br>Registry         |
| All strokes<br>(intracerebral             | Yes/no                                           |  |                                                         | Danish Stroke<br>Registry         |

|                                                                                                                    |        |  |  |                                     |
|--------------------------------------------------------------------------------------------------------------------|--------|--|--|-------------------------------------|
| hemorrhage or<br>ischemic stroke)                                                                                  |        |  |  |                                     |
| Cerebrovascular<br>ischemic events<br>(ischemic stroke,<br>unspecified stroke,<br>or transient ischemic<br>attack) | Yes/no |  |  | Danish Stroke<br>Registry           |
| All-cause death                                                                                                    | Yes/no |  |  | Danish Civil<br>Registration System |
| * Prescription data from 180 days before diagnosis of intracerebral hemorrhage.                                    |        |  |  |                                     |

**Table S2.** Baseline patient characteristics of the subpopulation initiating/resuming oral anticoagulant therapy during follow-up.

| <b>Characteristics, % (N)</b>                              | <b>All</b>       | <b>CHA<sub>2</sub>DS<sub>2</sub>-VASc<br/>score 2-3</b> | <b>CHA<sub>2</sub>DS<sub>2</sub>-VASc<br/>score 4-6</b> | <b>CHA<sub>2</sub>DS<sub>2</sub>-VASc<br/>score &gt;6</b> |
|------------------------------------------------------------|------------------|---------------------------------------------------------|---------------------------------------------------------|-----------------------------------------------------------|
| N (%)                                                      | 526              | 159                                                     | 243                                                     | 124                                                       |
| Age, median (IQR)                                          | 78.0 (73.0-84.0) | 75.0 (68.0-82.0)                                        | 78.0 (73.0-84.0)                                        | 82.0 (77.0-85.0)                                          |
| ≥65 years                                                  | 93.7 (493)       | 88.7 (141)                                              | 94.7 (230)                                              | 98.4 (122)                                                |
| ≥75 years                                                  | 67.7 (356)       | 50.3 (80)                                               | 70.0 (170)                                              | 85.5 (106)                                                |
| Female sex                                                 | 43.3 (228)       | 17.6 (28)                                               | 46.5 (113)                                              | 70.2 (87)                                                 |
| CHA <sub>2</sub> DS <sub>2</sub> -VASc score, median (IQR) | 4.0 (3.0-5.0)    | 3.0 (2.0-3.0)                                           | 4.0 (4.0-5.0)                                           | 6.0 (6.0-7.0)                                             |
| Scandinavian Stroke Scale score*,<br>median (IQR)          | 47.0 (34.0-54.0) | 49.0 (32.0-56.0)                                        | 46.5 (34.0-54.0)                                        | 46.0 (38.0-54.0)                                          |
| Mild (58-44)                                               | 56.3 (296)       | 57.2 (91)                                               | 55.6 (135)                                              | 56.5 (70)                                                 |
| Moderate (26-43)                                           | 25.1 (132)       | 22.6 (36)                                               | 24.3 (59)                                               | 29.8 (37)                                                 |
| Severe (<26)                                               | 14.6 (77)        | 16.4 (26)                                               | 14.8 (36)                                               | 12.1 (15)                                                 |

|                                                 |            |            |            |            |
|-------------------------------------------------|------------|------------|------------|------------|
| Missing                                         | 4.0 (21)   | 3.8 (6)    | 5.3 (13)   | - (<5)     |
| Surgical evacuation of intracerebral hemorrhage | 2.3 (12)   | - (<5)     | 2.1 (5)    | - (<5)     |
| <b>Comorbidities</b>                            |            |            |            |            |
| Diabetes mellitus                               | 18.8 (99)  | 5.7 (9)    | 18.1 (44)  | 37.1 (46)  |
| Hypertension                                    | 80.0 (421) | 65.4 (104) | 82.3 (200) | 94.4 (117) |
| Heart failure                                   | 30.2 (159) | 17.0 (27)  | 30.5 (74)  | 46.8 (58)  |
| Chronic kidney disease                          | 8.2 (43)   | 6.9 (11)   | 7.8 (19)   | 10.5 (13)  |
| Peripheral artery disease                       | 18.4 (97)  | 10.1 (16)  | 14.4 (35)  | 37.1 (46)  |
| Previous myocardial infarction                  | 16.7 (88)  | 9.4 (15)   | 13.6 (33)  | 32.3 (40)  |
| Chronic obstructive pulmonary disorder          | 16.0 (84)  | 13.2 (21)  | 16.0 (39)  | 19.4 (24)  |
| Previous ischemic stroke                        | 34.4 (181) | 11.3 (18)  | 35.8 (87)  | 61.3 (76)  |
| Previous major extracranial bleeding            | 17.7 (93)  | 18.9 (30)  | 18.1 (44)  | 15.3 (19)  |
| <b>Lifestyle</b>                                |            |            |            |            |
| Smoking                                         |            |            |            |            |



|                                 |            |            |            |            |
|---------------------------------|------------|------------|------------|------------|
| Never                           | 36.5 (192) | 31.4 (50)  | 38.7 (94)  | 38.7 (48)  |
| Former                          | 32.7 (172) | 35.8 (57)  | 29.6 (72)  | 34.7 (43)  |
| Current                         | 14.1 (74)  | 13.2 (21)  | 14.8 (36)  | 13.7 (17)  |
| Missing                         | 16.7 (88)  | 19.5 (31)  | 16.9 (41)  | 12.9 (16)  |
| <b>Alcohol intake†</b>          |            |            |            |            |
| Recommended                     | 76.2 (401) | 68.6 (109) | 78.6 (191) | 81.5 (101) |
| Above recommended               | 9.7 (51)   | 14.5 (23)  | 8.2 (20)   | 6.5 (8)    |
| Missing                         | 14.1 (74)  | 17.0 (27)  | 13.2 (32)  | 12.1 (15)  |
| <b>Civil status</b>             |            |            |            |            |
| Cohabitant                      | 59.1 (311) | 62.3 (99)  | 61.7 (150) | 50.0 (62)  |
| Alone                           | 38.0 (200) | 34.0 (54)  | 35.4 (86)  | 48.4 (60)  |
| Other                           | 1.0 (5)    | - (<5)     | - (<5)     | - (<5)     |
| Missing                         | 1.9 (10)   | - (<5)     | - (<5)     | - (<5)     |
| <b>Medication‡</b>              |            |            |            |            |
| Statins                         | 60.6 (319) | 49.1 (78)  | 61.7 (150) | 73.4 (91)  |
| SSRI                            | 11.4 (60)  | 8.2 (13)   | 12.3 (30)  | 13.7 (17)  |
| <b>Antithrombotic treatment</b> |            |            |            |            |

|                                             |            |            |            |           |
|---------------------------------------------|------------|------------|------------|-----------|
| None                                        | 9.3 (49)   | 9.4 (15)   | 11.5 (28)  | 4.8 (6)   |
| Antiplatelet therapy alone                  | 9.5 (50)   | 5.0 (8)    | 7.8 (19)   | 18.5 (23) |
| Oral anticoagulant therapy alone            | 63.3 (333) | 67.9 (108) | 62.1 (151) | 59.7 (74) |
| Antiplatelet and oral anticoagulant therapy | 17.9 (94)  | 17.6 (28)  | 18.5 (45)  | 16.9 (21) |

Numbers are % (*N*) unless otherwise noted. SD: Standard deviation. ICH: Intracerebral hemorrhage. IQR: Interquartile range. SSRI: Selective Serotonin Reuptake Inhibitor.

\*Severity of the index ICH was graded by the Scandinavian Stroke Scale, which (among others) includes assessment of the patient's level of consciousness, eye movements, coordination ability, and ability to speak.(35) The total of the score is a maximum of 58 and lower scores indicate more severe intracerebral hemorrhage events; categories of severity were defined as: 58-44 'mild'; 43-26 'moderate'; and <26 'severe'.

†Recommended alcohol intake per week:  $\leq 7$  for women and  $\leq 14$  for men.

‡Patients with a claimed prescription of the medication within 180 days before the incident intracerebral hemorrhage.

If the patient number is below five (<5), the exact number is not allowed to be presented due to individual data protection.

**Table S3.** Absolute risk of cerebrovascular events and all-cause death 1 year after initiation/resumption of oral anticoagulant therapy in patients with intracerebral hemorrhage and atrial fibrillation.

| Absolute risk after 1 year after initiation/resumption of oral anticoagulant therapy                                                                                                                                                                                                                                                                  | <i>Recurrent intracerebral hemorrhage</i> |                  | <i>Cerebrovascular ischemic event*</i> |                  | <i>All-cause death</i> |                     |
|-------------------------------------------------------------------------------------------------------------------------------------------------------------------------------------------------------------------------------------------------------------------------------------------------------------------------------------------------------|-------------------------------------------|------------------|----------------------------------------|------------------|------------------------|---------------------|
|                                                                                                                                                                                                                                                                                                                                                       | Events, n                                 | Risk % (95% CI)  | Events, n                              | Risk % (95% CI)  | Events, n              | Risk % (95% CI)     |
| <b>OAC initiation during follow-up</b>                                                                                                                                                                                                                                                                                                                |                                           |                  |                                        |                  |                        |                     |
| All (N=526)                                                                                                                                                                                                                                                                                                                                           | 12                                        | 2.4 (1.3 to 4.1) | 15                                     | 3.1 (1.8 to 4.9) | 100                    | 20.0 (16.7 to 23.8) |
| CHA <sub>2</sub> DS <sub>2</sub> -VASc score 2-3 (N=602)                                                                                                                                                                                                                                                                                              | <5                                        | 2.7 (0.9 to 6.2) | 6                                      | 4.2 (1.7 to 8.2) | 20                     | 13.3 (8.8 to 19.9)  |
| CHA <sub>2</sub> DS <sub>2</sub> -VASc score 4-6 (N=866)                                                                                                                                                                                                                                                                                              | <5                                        | 1.8 (0.6 to 4.2) | 6                                      | 2.7 (1.1 to 5.4) | 55                     | 23.9 (18.8 to 29.9) |
| CHA <sub>2</sub> DS <sub>2</sub> -VASc score >6 (N=416)                                                                                                                                                                                                                                                                                               | <5                                        | 3.6 (1.2 to 8.4) | <5                                     | 2.5 (0.7 to 6.6) | 25                     | 20.9 (14.6 to 29.4) |
| <p>*Composite of ischemic stroke, unspecified stroke, or transient ischemic attack.<br/>           †Composite of intracerebral hemorrhage, ischemic stroke, unspecified stroke, or transient ischemic attack.<br/>           The exact number is masked because of individual level data protection if the event count is less than five (&lt;5),</p> |                                           |                  |                                        |                  |                        |                     |

## **PRESTIGE-AF Consortium Author List**

### **PARTNER 1: IMPERIAL COLLEGE OF SCIENCE TECHNOLOGY AND MEDICINE**

Professor Roland Veltkamp, MD<sup>1,2,3</sup>, Ms Kirsten H Harvey, MRes<sup>1</sup>, Dr Eleni Korompoki, MD PhD<sup>1,5</sup>, Dr Lucio D'Anna, PhD<sup>1,4</sup>, Dr Omid Halse, FRCP<sup>1,4</sup>

1 Dept. of Brain Sciences, Imperial College London, London, United Kingdom

2 Dept of Neurology, Alfried-Krupp Krankenhaus Essen Germany

3 Dept of Neurology, University Heidelberg, Germany

4 Department of Stroke and Neuroscience, Charing Cross Hospital, Imperial College Healthcare NHS Trust, London, United Kingdom

5 Department of Clinical Therapeutics, National and Kapodistrian University of Athens, Alexandra Hospital, Athens, Greece

### **PARTNER 2: UNIVERSITAETSKLINIKUM WUERZBURG – CTCW**

Klemens Hügen<sup>1</sup>, Dr. Uwe Malzahn PhD<sup>1</sup>, Sabine Ullmann<sup>1</sup>, Carolin Schuhmann<sup>1</sup>, Dr. Gabriele Putz Todd PhD<sup>1</sup>, Hannes Brinz<sup>1</sup>

1 Clinical Trial Center Wuerzburg at University Hospital Wuerzburg

### **PARTNER 3: JULIUS-MAXIMILIANS UNIVERSITAT WURZBURG**

Prof Peter U. Heuschmann<sup>1,2</sup>, Dr Kirsten Haas<sup>1</sup>, Dr Viktoria Rücker<sup>1</sup>

1 Institute of Clinical Epidemiology and Biometry, University of Würzburg, Würzburg, Germany, 2 Clinical Trial Center, University Hospital Würzburg, Germany

### **PARTNER 4: MEDIZINISCHE UNIVERSITAT GRAZ**

Prof. Christian Enzinger<sup>1</sup> MD, Dr. Stefan Ropele<sup>1</sup> PhD, Dr. Daniela Pinter<sup>1</sup> PhD, Dr. Melanie Haidegger<sup>1</sup> MD, Prof. Thomas Gatteringer<sup>1</sup> MD, Dr. Simon Fandler-Höfler<sup>1</sup> MD.

1 Department of Neurology, Medical University of Graz, Graz, Austria

### **PARTNER 6: KING'S COLLEGE LONDON**

Charles D. A. Wolfe<sup>1,2,3</sup>, Yanzhong Wang<sup>1,2,3</sup>, Hatem A. Wafa<sup>1,2,3</sup>

1 School of Population Health and Environmental Sciences, King's College London, London, United Kingdom,

2 National Institute for Health Research (NIHR) Biomedical Research Centre, Guy's and St Thomas' NHS Foundation Trust and King's College London, London, United Kingdom,

3 National Institute for Health Research (NIHR) Collaboration for Leadership in Applied Health Research and Care (CLAHRC) South London, London, United Kingdom.

### **PARTNER 7: FUNDACIO HOSPITAL UNIVERSITARI VALL D'HEBRON - INSTITUT DE RECERCA**

Dr Joan Montaner<sup>1,2</sup>, Elena Palà<sup>2</sup>

1 Institute de Biomedicine of Seville, IBiS/Hospital Universitario Virgen del Rocío/CSIC/University of Seville & Department of Neurology, Hospital Universitario Virgen Macarena, Seville, Spain

2. Neurovascular Research Laboratory, Vall d'Hebron Institute of Research (VHIR), Hospital Vall d'Hebron, Universitat Autònoma de Barcelona, Barcelona, Spain.

### **PARTNER 8: UNIVERSITE DE BORDEAUX UBx France**

Prof. Stéphanie Debette, MD PhD<sup>1,2</sup>, Prof. Igor Sibon MD PhD<sup>2</sup>, Dr Pauline Renou MD<sup>2</sup>, Morgane Lachaize MSc<sup>1,2</sup>, Dr Léa Milan PhD<sup>2</sup>, Nathalie Heyvang MSc<sup>2</sup>, Sylvain Ledure MSc<sup>2</sup>, Pascale Michel MSc<sup>2</sup>

1 UMR1219 Bordeaux Population Health Center (Team VINTAGE), INSERM-University of Bordeaux, Bordeaux, France,

2 Department of Neurovascular Unit, University Hospital Centre Bordeaux, Bordeaux, France

### **PARTNER 9: AZIENDA OSPEDALIERA DI PERUGIA**

Dr Mara Graziani, MD<sup>1</sup>, Dr Laura Marchini, MD<sup>1</sup>, Prof Valeria Caso, MD<sup>2</sup>

1 Internal, Vascular and Emergency Medicine - Stroke Unit, University of Perugia, Perugia, Italy

2 Stroke Unit, University of Perugia, Santa Maria della Misericordia Hospital Perugia, Italy

### **PARTNER 10: REGION NORDJYLLAND (NORTH DENMARK REGION)**

Assoc. Prof Peter Brønnum Nielsen, PhD<sup>1,2</sup>

Prof Torben Bjerregaard Larsen, PhD<sup>1,2</sup>

Prof Gregory YH Lip, MD<sup>1,3</sup>

1 Aalborg Thrombosis Research Unit, Department of Clinical Medicine, Faculty of Health, Aalborg University, Aalborg, Denmark

2 Department of Cardiology, Aalborg University Hospital, Aalborg, Denmark

3 Liverpool Centre for Cardiovascular Science, University of Liverpool and Liverpool Heart & Chest Hospital, Liverpool, United Kingdom

### **PARTNER 11: STROKE ALLIANCE FOR EUROPE**

N/A

### **PARTNER 12: UNIVERSITÄTSKLINIKUM HEIDELBERG**

PD Dr Solveigh Horstmann<sup>1</sup>, MD. PD Dr Jan Purrucker<sup>1</sup>, MD. Prof Dr Peter Ringleb<sup>1</sup>, MD. Dr Mariam Haffa<sup>2</sup>, PhD. Dr Torsten Hoppe-Tichy<sup>2</sup>, PhD.

Prof Dr Walter E. Haefeli<sup>3,4</sup>, MD. Prof Dr. sc. hum. Hanna M. Seidling<sup>3,4</sup>. Dr Jürgen Burhenne<sup>3</sup>, PhD. Dr Kathrin I. Foerster<sup>3</sup>, PhD.

1 Department of Neurology, Heidelberg University Hospital, Heidelberg, Germany

2 Pharmacy Department, Heidelberg University Hospital, Heidelberg, Germany

3 Department of Clinical Pharmacology and Pharmacoepidemiology, Heidelberg University Hospital, Heidelberg, Germany

4 Cooperation Unit Clinical Pharmacy, Heidelberg University, Heidelberg, Germany

### **PARTNER 13: THE UNIVERSITY OF LIVERPOOL**

Dr Deirdre A Lane<sup>1,2,3</sup> PhD, Prof Gregory YH Lip<sup>1,2,3</sup> MD

1 Liverpool Centre for Cardiovascular Science, University of Liverpool and Liverpool Heart and Chest Hospital, Liverpool, United Kingdom,

2 Cardiovascular and Metabolic Medicine, Institute of Life Course and Medical Sciences, University of Liverpool, Liverpool, United Kingdom,

3 Department of Clinical Medicine, Aalborg University, Aalborg, Denmark

In addition, for the qualitative work for WP10: Ms Elena Ivany<sup>1,2</sup> MSc and Dr Robyn Lotto<sup>4</sup> PhD



STROBE Statement—Checklist of items that should be included in reports of *cohort studies*

|                          | Item No | Recommendation                                                                                                                                                                       | Page                |
|--------------------------|---------|--------------------------------------------------------------------------------------------------------------------------------------------------------------------------------------|---------------------|
| Title and abstract       | 1       | (a) Indicate the study's design with a commonly used term in the title or the abstract                                                                                               | 1                   |
|                          |         | (b) Provide in the abstract an informative and balanced summary of what was done and what was found                                                                                  | 2                   |
| <b>Introduction</b>      |         |                                                                                                                                                                                      |                     |
| Background/rationale     | 2       | Explain the scientific background and rationale for the investigation being reported                                                                                                 | 4                   |
| Objectives               | 3       | State specific objectives, including any prespecified hypotheses                                                                                                                     | 4                   |
| <b>Methods</b>           |         |                                                                                                                                                                                      |                     |
| Study design             | 4       | Present key elements of study design early in the paper                                                                                                                              | 6                   |
| Setting                  | 5       | Describe the setting, locations, and relevant dates, including periods of recruitment, exposure, follow-up, and data collection                                                      | 6 and 7             |
| Participants             | 6       | (a) Give the eligibility criteria, and the sources and methods of selection of participants. Describe methods of follow-up                                                           | Fig 1               |
|                          |         | (b) For matched studies, give matching criteria and number of exposed and unexposed                                                                                                  | N/A                 |
| Variables                | 7       | Clearly define all outcomes, exposures, predictors, potential confounders, and effect modifiers. Give diagnostic criteria, if applicable                                             | 8                   |
| Data sources/measurement | 8*      | For each variable of interest, give sources of data and details of methods of assessment (measurement). Describe comparability of assessment methods if there is more than one group | 7<br>Suppl. Table 1 |
| Bias                     | 9       | Describe any efforts to address potential sources of bias                                                                                                                            | 8 and 9             |
| Study size               | 10      | Explain how the study size was arrived at                                                                                                                                            | Fig 1               |
| Quantitative variables   | 11      | Explain how quantitative variables were handled in the analyses. If applicable, describe which groupings were chosen and why                                                         | 8                   |
| Statistical methods      | 12      | (a) Describe all statistical methods, including those used to control for confounding                                                                                                | 8 and 9             |
|                          |         | (b) Describe any methods used to examine subgroups and interactions                                                                                                                  | 9                   |
|                          |         | (c) Explain how missing data were addressed                                                                                                                                          | N/A                 |

|                   |     |                                                                                                                                                                                                              |                      |
|-------------------|-----|--------------------------------------------------------------------------------------------------------------------------------------------------------------------------------------------------------------|----------------------|
|                   |     | (d) If applicable, explain how loss to follow-up was addressed                                                                                                                                               | 9                    |
|                   |     | (e) Describe any sensitivity analyses                                                                                                                                                                        | 9                    |
| <b>Results</b>    |     |                                                                                                                                                                                                              |                      |
| Participants      | 13* | (a) Report numbers of individuals at each stage of study—eg numbers potentially eligible, examined for eligibility, confirmed eligible, included in the study, completing follow-up, and analysed            | 10                   |
|                   |     | (b) Give reasons for non-participation at each stage                                                                                                                                                         | Fig 1                |
|                   |     | (c) Consider use of a flow diagram                                                                                                                                                                           | Fig 1                |
| Descriptive data  | 14* | (a) Give characteristics of study participants (eg demographic, clinical, social) and information on exposures and potential confounders                                                                     | Table 1              |
|                   |     | (b) Indicate number of participants with missing data for each variable of interest                                                                                                                          | N/A                  |
|                   |     | (c) Summarise follow-up time (eg, average and total amount)                                                                                                                                                  | 10                   |
| Outcome data      | 15* | Report numbers of outcome events or summary measures over time                                                                                                                                               | 10 and 11<br>Table 2 |
| Main results      | 16  | (a) Give unadjusted estimates and, if applicable, confounder-adjusted estimates and their precision (eg, 95% confidence interval). Make clear which confounders were adjusted for and why they were included | Table 2<br>10 and 11 |
|                   |     | (b) Report category boundaries when continuous variables were categorized                                                                                                                                    | N/A                  |
|                   |     | (c) If relevant, consider translating estimates of relative risk into absolute risk for a meaningful time period                                                                                             | 11                   |
| Other analyses    | 17  | Report other analyses done—eg analyses of subgroups and interactions, and sensitivity analyses                                                                                                               | 11<br>Table 3        |
| <b>Discussion</b> |     |                                                                                                                                                                                                              |                      |
| Key results       | 18  | Summarise key results with reference to study objectives                                                                                                                                                     | 13                   |
| Limitations       | 19  | Discuss limitations of the study, taking into account sources of potential bias or imprecision. Discuss both direction and magnitude of any potential bias                                                   | 15 and 16            |
| Interpretation    | 20  | Give a cautious overall interpretation of results considering objectives, limitations, multiplicity of analyses, results from similar studies, and other relevant evidence                                   | 13 and 14            |
| Generalisability  | 21  | Discuss the generalisability (external validity) of the study results                                                                                                                                        | 14 and 15            |



| <b>Other information</b> |    |                                                                                                                                                               |   |
|--------------------------|----|---------------------------------------------------------------------------------------------------------------------------------------------------------------|---|
| Funding                  | 22 | Give the source of funding and the role of the funders for the present study and, if applicable, for the original study on which the present article is based | 1 |

\*Give information separately for exposed and unexposed groups.

**Note:** An Explanation and Elaboration article discusses each checklist item and gives methodological background and published examples of transparent reporting. The STROBE checklist is best used in conjunction with this article (freely available on the Web sites of PLoS Medicine at <http://www.plosmedicine.org/>, Annals of Internal Medicine at <http://www.annals.org/>, and Epidemiology at <http://www.epidem.com/>). Information on the STROBE Initiative is available at <http://www.strobe-statement.org>.
